# Supplementary material
Source: publisher figshare collection journal article supplement (https://tandf.figshare.com/articles/dataset/_/7110323)
Supplement: Supplementary file 1 [file 2]

**Table S1. Genotypes of flies used in this study**

| <b>Figure 1</b> |                                         |
|-----------------|-----------------------------------------|
| A               | <i>w/+; Gr5a-GAL4/+</i>                 |
|                 | <i>w; Gr5a-GAL4/UAS-dTrpA1</i>          |
|                 | <i>w/+; Gr28b.a-GAL4/+</i>              |
|                 | <i>w; UAS-dTrpA1/Gr28b.a-GAL4</i>       |
|                 | <i>w/+;; Gr28b.b-GAL4/+</i>             |
|                 | <i>w; UAS-dTrpA1/+; Gr28b.b-GAL4/+</i>  |
|                 | <i>w/+; Gr28b.c-GAL4/+</i>              |
|                 | <i>w; UAS-dTrpA1/Gr28b.c-GAL4</i>       |
|                 | <i>w/+; Gr28b.d-GAL4/+</i>              |
|                 | <i>w; UAS-dTrpA1/Gr28b.d-GAL4</i>       |
|                 | <i>w/+; Gr28b.e-GAL4/+</i>              |
|                 | <i>w; UAS-dTrpA1/Gr28b.e-GAL4</i>       |
|                 | <i>w/+; Sp/+; Gr32a-GAL4/+</i>          |
|                 | <i>w/+; UAS-dTrpA1/Sp; Gr32a-GAL4/+</i> |
|                 | <i>w/+; Sp/+; Gr33a-GAL4/+</i>          |
|                 | <i>w/+; UAS-dTrpA1/Sp; Gr33a-GAL4/+</i> |
|                 | <i>w/+; Sp/+; Gr39b-GAL4/+</i>          |
|                 | <i>w/+; UAS-dTrpA1/Sp; Gr39b-GAL4/+</i> |
|                 | <i>w/+; Gr43a-GAL4/+</i>                |
|                 | <i>w; Gr43a-GAL4/UAS-dTrpA1</i>         |
|                 | <i>w/+; Gr61a-GAL4/+</i>                |
|                 | <i>w; Gr61a-GAL4/UAS-dTrpA1</i>         |
|                 | <i>w/+;; Gr64c-GAL4/+</i>               |
|                 | <i>w; UAS-dTrpA1+; Gr64c-GAL4/+</i>     |
|                 | <i>w/+; Gr64e-GAL4/+</i>                |
|                 | <i>w; Gr64e-GAL4/UAS-dTrpA1</i>         |

|                 |                                                                                                                                                                                                                |
|-----------------|----------------------------------------------------------------------------------------------------------------------------------------------------------------------------------------------------------------|
|                 | <i>w/+; Gr64f-GAL4/+</i>                                                                                                                                                                                       |
|                 | <i>w; Gr64f-GAL4/UAS-dTrpA1</i>                                                                                                                                                                                |
| B               | <i>w/+; Otd-FLP/+; UAS&gt;STOP&gt;dTrpA1<sup>mCherry</sup>/+</i>                                                                                                                                               |
|                 | <i>w; Gr28b.d-GAL4/Otd-FLP; UAS&gt;STOP&gt;dTrpA1<sup>mCherry</sup>/+</i>                                                                                                                                      |
| C               | <i>yw, ey-FLP/+; UAS&gt;STOP&gt;dTrpA1<sup>myc</sup>/+</i>                                                                                                                                                     |
|                 | <i>yw, ey-FLP/w; Gr28b.d-GAL4/UAS&gt;STOP&gt;dTrpA1<sup>myc</sup></i>                                                                                                                                          |
| <b>Figure 2</b> |                                                                                                                                                                                                                |
| A               | <i>yw, ey-FLP/w; Gr28b.d-GAL4/+; 10XUAS&gt;STOP&gt;IVS-myr::<gfp +<="" i=""></gfp></i>                                                                                                                         |
| C               | <i>w; Gr28b.d-GAL4/8XlexAop2-IVS-GAL80-WPRE;</i><br><i>10XUAS-IVS-myr::<gfp i="" ir93a-lexa<=""></gfp></i>                                                                                                     |
| D               | <i>w; Gr28b.d-GAL4/UAS-dTrpA1</i>                                                                                                                                                                              |
|                 | <i>w; UAS-dTrpA1/8XlexAop2-IVS-GAL80-WPRE; Ir93a-lexA/+</i>                                                                                                                                                    |
|                 | <i>w; Gr28b.d-GAL4/8XlexAop2-IVS-GAL80-WPRE; UAS-dTrpA1/Ir93a-lexA</i>                                                                                                                                         |
| E               | <i>w; Ir40a-GAL4/10XUAS-IVS-mCD8::<gfp< i=""></gfp<></i>                                                                                                                                                       |
| F               | <i>w/+; Ir40a-GAL4/+</i>                                                                                                                                                                                       |
|                 | <i>w/+; UAS-dTrpA1/+</i>                                                                                                                                                                                       |
|                 | <i>w; UAS-dTrpA1/Ir40a-GAL4</i>                                                                                                                                                                                |
| <b>Figure 3</b> |                                                                                                                                                                                                                |
| A, B            | <i>w, hs-FLP/w; Gr28b.d-GAL4/+; 10XUAS&gt;STOP&gt;smGdP::<ha,< i=""><br/><i>10XUAS&gt;STOP&gt;smGdP::<v5-ths-10xuas&gt;stop&gt;smgdp::<flag +<="" i=""></v5-ths-10xuas&gt;stop&gt;smgdp::<flag></i></ha,<></i> |
| C               | <i>w; Gr28b.d-GAL4/ 20XUAS-6XGFP; UAS-RedStinger/+</i>                                                                                                                                                         |
| <b>Figure 4</b> |                                                                                                                                                                                                                |
| A               | (active TNT) <i>w; Gr28b.d-GAL4/UAS-TNTG</i>                                                                                                                                                                   |
|                 | (inactive TNT) <i>w; Gr28b.d-GAL4/UAS-TNTVA</i>                                                                                                                                                                |
| B               | <i>w/+; Gr28b<sup>MB03888</sup>/+</i>                                                                                                                                                                          |
|                 | <i>w/+; Df(2L)Exel7031/+</i>                                                                                                                                                                                   |
|                 | <i>w; Gr28b<sup>MB03888</sup>/Df(2L)Exel7031</i>                                                                                                                                                               |
|                 | Canton-S                                                                                                                                                                                                       |
| <b>Figure 5</b> |                                                                                                                                                                                                                |

|                                                                      |                                                                      |
|----------------------------------------------------------------------|----------------------------------------------------------------------|
| A                                                                    | <i>w/+; Gr28b.d-GAL4/+ (Retinal -)</i>                               |
|                                                                      | <i>w/+; Gr28b.d-GAL4/+ (Retinal +)</i>                               |
|                                                                      | <i>w/+;; 20XUAS-IVS-CsChrimson.mVenus/+ (Retinal -)</i>              |
|                                                                      | <i>w/+;; 20XUAS-IVS-CsChrimson.mVenus/+ (Retinal +)</i>              |
|                                                                      | <i>w; Gr28b.d-GAL4/+; 20XUAS-IVS-CsChrimson.mVenus/+ (Retinal -)</i> |
|                                                                      | <i>w; Gr28b.d-GAL4/+; 20XUAS-IVS-CsChrimson.mVenus/+ (Retinal +)</i> |
| F                                                                    | <i>w; Gr28b.d-GAL4/+; 20XUAS-IVS-CsChrimson.mVenus/+ (Retinal -)</i> |
|                                                                      | <i>w; Gr28b.d-GAL4/+; 20XUAS-IVS-CsChrimson.mVenus/+ (Retinal +)</i> |
| <b>Figure S1</b>                                                     |                                                                      |
| A                                                                    | <i>w; 10XUAS-IVS-mCD8::GFP/+; VT11321-GAL4/+</i>                     |
| B                                                                    | <i>w/+;; VT11321-GAL4/+</i>                                          |
|                                                                      | <i>w; UAS-dTrpA1/+; VT11321-GAL4/+</i>                               |
| C                                                                    | <i>w; 10XUAS-IVS-mCD8::GFP/+; VT44927-GAL4/+</i>                     |
| D                                                                    | <i>w/+;; VT44927-GAL4/+</i>                                          |
|                                                                      | <i>w; UAS-dTrpA1/+; VT44927-GAL4/+</i>                               |
| <b>Figure S2</b>                                                     |                                                                      |
| A                                                                    | (active TNT) <i>w; Gr28b.d-GAL4/UAS-TNTG</i>                         |
|                                                                      | (inactive TNT) <i>w; Gr28b.d-GAL4/UAS-TNTVA</i>                      |
| B                                                                    | <i>w/+; Gr28b<sup>MB03888</sup>/+</i>                                |
|                                                                      | <i>w/+; Df(2L)Exel7031/+</i>                                         |
|                                                                      | <i>w; Gr28b<sup>MB03888</sup>/Df(2L)Exel7031</i>                     |
|                                                                      | Canton-S                                                             |
| <b>Movie S1</b>                                                      |                                                                      |
| <i>w/+; Gr28b.d-GAL4/+</i>                                           |                                                                      |
| <i>w; UAS-dTrpA1/Gr28b.d-GAL4</i>                                    |                                                                      |
| <b>Movie S2</b>                                                      |                                                                      |
| <i>w; Gr28b.d-GAL4/+; 20XUAS-IVS-CsChrimson.mVenus/+ (Retinal -)</i> |                                                                      |
| <i>w; Gr28b.d-GAL4/+; 20XUAS-IVS-CsChrimson.mVenus/+ (Retinal +)</i> |                                                                      |
